# Supplementary material for: The Genotypic and Phenotypic Stability of Plasmodium falciparum Field Isolates in Continuous In Vitro Culture
Source: PLoS One. 2016 Jan 11;11(1):e0143565. doi: 10.1371/journal.pone.0143565 (PMC4713440; doi:10.1371/journal.pone.0143565)
Supplement: S2 Table — Raw data shown with all the alleles detected per locus. (XLSX) [file pone.0143565.s002.xlsx]

## Sheet: Table S2 MS data KDH963;973;974
MS RAW DATA
Sample ID	2490	ARA2	Pfg377	Pfpk2	Polyα	TA1	TA109	TA40	TA42	TA60	TA81	TA87
3D7	81	67	98	165, 167	151	186	172	221	200	82	121	95
H 63D0	81	58,62	102	171174	154157	177	184	218	200	79	121124	116
H 63D6	81	64,65	101	158	179182	186	173	212	185	70	130	92
H 63D18	81	61,62	101	170173	154157	177	184	218	200	79	124	113, 116
H 63D21	81	61,62	101	171173	154157	177	184	218	200	79	124	116
H 63D25	81	61,62	101	170173	154157	177	184	ND	200	79	124	113
H 63D31	81	61,62	101	171173	154157	177	184	218	200	79	124	116117
H 63D34	81	62	101	174	157	176	184	218	200	79	124	116117
H 63D36	81	60	ND	ND	ND	ND	ND	218	200	79	124	116
H 63D38	84.26	69.63	102	158.29	191, 194	167.94	160.37		185.06	82.11	124.1	106.82
H 63D40	84.27	69.63	101.98	158.42	191, 194	167.83	160.5	214.65	184.94	82.15	123.97	106.67
H 63D44	84.4	69.6	101.99	158.42	191, 194	167.98	160.38	214.59	184.89	82.01	124.06	106.79
H 68D48	81.09	60.54	102	173.28	154, 157	ND	184.28	218.04	200	79.08	124.06	105.83
H 63D51	81.35	60.65	101.98	173.5	157.31	ND	184.47	217.94	200.13	79.1	123.96	107, 116
H 63D55	84.39	69.57	102	158.54	151, 154, 157, 191, 194	167.86	160.37	214.68	185.09	82.18	123.97	115.4
H 63D57	81, 85	61, 70	101.97	159, 174	157.18	168, 177	161, 185	218, 219	185, 200	79.08	124.05	115.45
H 63D60		61.8	102	174.12	157.19	ND	184.21	217.99	162.61	79.1	124.02	116.36
H 63D63	81, 85	61, 71	101.75	159.39	162.23	167.89	159.76	214.53	185, 200	79.12	123.94	108, 116
H 63D67	85.24	70, 71	102.14	158, 159	194, 191	168.15	159.76	214.63	184.96	82.18	124.11	107, 108
H 63D70	ND	70.47	101.14	ND	191, 194	167.67	160, 161	214.57	184.7	82.09	124.21	107, 108
H 63D74	84.23	70, 71	101.88	158, 159	191, 194	167.8	160.51	214.53	184.78	82.18	124.26	107, 180
H 63D78	84.17	70.58	101.75	158, 159	191, 194	168.05	160.75	214.53	184.72	81.95	123.81	107, 108
H 63D80	81.12	58.41	102.14	170.51	157.15	176.91	185.26	ND	200.13	78.99	124.11	105.63
H 63D84	84.26	69, 70	101.75	158, 159	191, 194	168.11	160.75	214.59	184.84	82.05	124.14
H 63D86	83.76	69, 70	100.65	157.88	190, 193	167.62	136, 160	215, 215	184.28	81, 82	97, 149	102, 107
H 63D88	83.72	69, 70	99.36	158, 159	190, 193	167.78	148, 160, 169, 172	215	182, 184	70.34	123.74	102, 106
H 63D90	83.72	69, 70	99, 100	155, 158, 159	150, 190	167.75	136, 157, 160	215.5	184.28	82.41	124, 149	102, 106
Sample ID	2490	ARA2	Pfg377	PFPK2	poly a	TA1	TA109	TA40	TA42	TA60	TA81	TA87
H 73-DO	80.73	64.03	101.13	155, 158	178, 181	185.5	ND	212.9	184.43	70.4	129.92	92, 104, 127
H 73-D2	80.76	63.09	101.14	155, 158	179, 181	185.51	ND	212, 213	184.4	70.29	130, 151	92.62
H 73-D5	80.66	63, 64	99.49	155, 159	178, 181	185.62	149, 160, 169, 173	212.53	184.27	70.42	129.91	93, 103
H 73-D7	81.06	63, 64	99, 102	155, 158	178, 181	185.56	149, 169, 173	212, 213	184.46	70.33	129.91	93, 103
H 73-D10	80.76	63.89	101.63	158, 159	178, 181	185.56	149, 160, 169, 172	212.57	184.4	69, 70	99, 100, 151	127.01
H 73-D12	81.03	63.95	102	15, 158	178, 181	186	149, 169, 172, 173	212, 213	184.4	70.36	98, 100, 151	126.91
H 73-D15	81.06	64.13	102	158.06	163, 178, 181,	186	149, 169, 172	211.77	184.55	70, 82	98, 100, 151	91, 103
H 73-D18	80.76	63.95	99, 102	155, 158	178, 181	186	169, 172, 174	212.39	184.46	69, 70	98, 100, 151	93, 103
H 73- D21	81	63, 64	101.02	155, 158	178, 181	185.56	149, 160, 169, 172	212, 213	182, 184	70.39	129.94	92.52
H 73-D35	80.69	63.72	100.78	158, 159	190, 193	185.46	ND	212.41	184.34	70.33	124, 149	127, 92
H 73-D37	81, 84	63.92	99.36	154, 159	190, 193	168, 185	149, 160, 169, 172	215.37	184.35	70, 82	124, 149	91.55
H 73-D40	81, 84	63.85	100.89	155, 158	178, 181	167.81	ND	212, 213	184.16	70, 81	129.78	92.44
H 73-D45	81, 84	64.07	101.02	158, 159	178, 181	168, 186	ND	213, 216	184.34	81, 70		102, 114
H 73-D55	83.89	69, 70	99, 101	155, 159	187,190,172, 175	ND	136, 161, 172	214.76	184.48	78, 82	130, 150	102, 107
H 73-D58	102.19	69, 70	102.06	158, 159	190, 193	ND	136, 161	214, 216	231.47	78, 82	124, 150	102, 107
H 73-D63	83.66	69.7	99.48	157.84	190, 193	167.76	136, 159	211, 212	184.34	78, 81, 82	124, 149	77, 102, 115
Sample ID	2490	ARA2	Pfg377	Pfpk2	Polyα	TA1	TA109	TA40	TA42	TA60	TA81	TA87
H 74-D0	84, 93	72, 73	99.38	158.47	ND	139, 160, 164	219.36	184.54	ND	118, 155	76 , 105	ND
H 74-D5	84, 93	72.93	101, 102	173, 176	148, 151	ND	160, 163	219.49	184.66		118.14	ND
H 74-D8	84, 93	69, 73	99.5	173176	148, 151	ND	160, 163	218, 219	184.46	ND	118.08	75, 86
H 74-D10	84, 94	69, 73	101, 102	185.5	150.8	ND	139, 160, 163	218.26	184.64	ND	154.43	96, 105,127
H 74-D13	84, 94	66, 72	99.5	158, 176	151, 194	ND	136, 157, 160, 164	215.82	182, 184	ND	123.95	105, 107
H 74-D15	84, 85, 94	70, 72	99, 100	158, 176	150.66	ND	136, 160, 163	215, 216	182, 184	ND	124.02	107.56
H 74-D18	84, 85	70.1	100.75	158.12	191, 194	ND	136, 160,163	215, 216	182, 184	ND	124.15	107.52
H 74-D22	83.98	69,70	101, 102	157.94	167.82	136, 160	215, 216		82, 83	123.87	103, 107	ND
H 74-D31	84, 85	70.01	100.76	157.94	ND	167.85	136, 157, 161	214, 215	182, 185	81, 83	124, 151	104, 107
H 74-D35	85.07	69.97		157.94	191, 194	167.91	136, 157, 160	215, 216	182, 184	82.51	98, 151	104, 107
H 74-D40	84, 85	54, 62, 70, 79, 82	91, 99	157.91	190, 193	167.91	159.63	215.57	182, 184	82.6	123.82	79, 104
H 74-D47	84, 94	69.89	ND	155, 158, 159, 176	147, 151, 190, 193	ND	136, 160, 163	214.62	184.6	73,83	124, 151	104, 107
H 74-D50	83.99	70.07	ND	155, 159	191, 193	ND	136, 157, 160	215, 215	184.48	82.51	124, 151	101, 104, 107, 118, 127
H 74-D55	83.85	69, 70	101, 102	157.94	191, 193	167.76	136, 161	215	184.41	79, 82	124, 151	105, 107
H 74 D60	83.98	69,70	101, 102	157.94	167.82	136, 160	215, 216	ND	82, 83	123.87	103, 107	108
H 74 D68	84, 85	70.01	100.76	157.94	ND	167.85	136, 157, 161	214, 215	182, 185	81, 83	124, 151	104, 107
H 74 D76	93	69.97	91	158	148, 151	167.91	136, 160, 163	218, 219	182, 184	82.51	118	104, 107
ND==> No Data
